# Supplementary material
Source: PubMed Central journal article supplement (PMC7666712)
Supplement: mmc1.pdf [file mmc1.pdf]

## Supplementary Information

### **An *in-silico* study on selected organosulfur compounds as potential drugs for SARS-CoV-2 infection *via* binding multiple drug targets**

Liya Thurakkal<sup>1#</sup>, Satyam Singh<sup>2#</sup>, Rajarshi Roy<sup>2</sup>, Parimal Kar<sup>2</sup>, Sushabhan Sadhukhan<sup>1\*</sup>,  
Mintu Porel<sup>1\*</sup>

<sup>1</sup>Discipline of Chemistry, Indian Institute of Technology Palakkad, Kerala 678 557, India;

<sup>2</sup>Discipline of Biosciences and Biomedical Engineering, Indian Institute of Technology  
Indore, Madhya Pradesh 453 552, India.

#Both authors contributed equally

\*Corresponding author. *E-mail address*: [mintu@iitpkd.ac.in](mailto:mintu@iitpkd.ac.in); [sushabhan@iitpkd.ac.in](mailto:sushabhan@iitpkd.ac.in)

**Table S1.** SwissTargetPrediction report obtained using Lurasidone as the query molecule

| Target                                             | Common name  | Uniprot ID       | ChEMBL ID     | Target Class                        | Probability*   | Known actives (3D/2D) |
|----------------------------------------------------|--------------|------------------|---------------|-------------------------------------|----------------|-----------------------|
| Serotonin 2a (5-HT <sub>2a</sub> ) receptor        | HTR2A        | P28223           | CHEMBL224     | Family A G protein-coupled receptor | 0.608268278407 | 1243 / 163            |
| Dopamine D2 receptor (by homology)                 | DRD2         | P14416           | CHEMBL217     | Family A G protein-coupled receptor | 0.599434549737 | 2915 / 337            |
| Serotonin 1a (5-HT <sub>1a</sub> ) receptor        | HTR1A        | P08908           | CHEMBL214     | Family A G protein-coupled receptor | 0.110612204199 | 1192 / 151            |
| Serotonin 1b (5-HT <sub>1b</sub> ) receptor        | HTR1B        | P28222           | CHEMBL1898    | Family A G protein-coupled receptor | 0.110612204199 | 392 / 3               |
| Sigma opioid receptor                              | SIGMAR1      | Q99720           | CHEMBL287     | Membrane receptor                   | 0.110612204199 | 810 / 1               |
| Serotonin 7 (5-HT <sub>7</sub> ) receptor          | HTR7         | P34969           | CHEMBL3155    | Family A G protein-coupled receptor | 0.110612204199 | 639 / 49              |
| C-C chemokine receptor type 3                      | CCR3         | P51677           | CHEMBL3473    | Family A G protein-coupled receptor | 0.110612204199 | 451 / 0               |
| Delta opioid receptor                              | OPRD1        | P41143           | CHEMBL236     | Family A G protein-coupled receptor | 0.110612204199 | 1012 / 0              |
| Melanocortin receptor 4                            | MC4R         | P32245           | CHEMBL259     | Family A G protein-coupled receptor | 0.110612204199 | 704 / 0               |
| Melanocortin receptor 1                            | MC1R         | Q01726           | CHEMBL3795    | Family A G protein-coupled receptor | 0.110612204199 | 102 / 0               |
| Melanocortin receptor 3                            | MC3R         | P41968           | CHEMBL4644    | Family A G protein-coupled receptor | 0.110612204199 | 146 / 0               |
| Neurokinin 2 receptor                              | TACR2        | P21452           | CHEMBL2327    | Family A G protein-coupled receptor | 0.110612204199 | 175 / 0               |
| Neurokinin 3 receptor                              | TACR3        | P29371           | CHEMBL4429    | Family A G protein-coupled receptor | 0.110612204199 | 126 / 0               |
| P-glycoprotein 1                                   | ABCB1        | P08183           | CHEMBL4302    | Primary active transporter          | 0.110612204199 | 125 / 0               |
| Cathepsin L                                        | CTSL         | P07711           | CHEMBL3837    | Protease                            | 0.110612204199 | 34 / 0                |
| Serotonin 6 (5-HT <sub>6</sub> ) receptor          | HTR6         | P50406           | CHEMBL3371    | Family A G protein-coupled receptor | 0.110612204199 | 220 / 30              |
| ATP-sensitive inward rectifier potassium channel 1 | KCNJ1        | P48048           | CHEMBL1293292 | Voltage-gated ion channel           | 0.110612204199 | 20 / 0                |
| Histamine H3 receptor                              | HRH3         | Q9Y5N1           | CHEMBL264     | Family A G protein-coupled receptor | 0.110612204199 | 544 / 0               |
| Protein farnesyltransferase                        | FNTA<br>FNTB | P49354<br>P49356 | CHEMBL2094108 | Enzyme                              | 0.110612204199 | 126 / 0               |
| Neurokinin 1 receptor                              | TACR1        | P25103           | CHEMBL249     | Family A G protein-coupled receptor | 0.110612204199 | 277 / 0               |
| Beta-secretase 1                                   | BACE1        | P56817           | CHEMBL4822    | Protease                            | 0.110612204199 | 111 / 0               |
| Acetyl-CoA carboxylase 1                           | ACACA        | Q13085           | CHEMBL3351    | Enzyme                              | 0.110612204199 | 44 / 0                |
| Phosphodiesterase 9A                               | PDE9A        | O76083           | CHEMBL3535    | Phosphodiesterase                   | 0.110612204199 | 14 / 0                |
| Phosphodiesterase 1C                               | PDE1C        | Q14123           | CHEMBL4619    | Phosphodiesterase                   | 0.110612204199 | 12 / 0                |
| Acetyl-CoA carboxylase 2                           | ACACB        | O00763           | CHEMBL4829    | Ligase                              | 0.110612204199 | 79 / 0                |
| Dipeptidyl peptidase II                            | DPP7         | Q9UHL4           | CHEMBL3976    | Protease                            | 0.110612204199 | 149 / 0               |
| Dipeptidyl peptidase VIII                          | DPP8         | Q6V1X1           | CHEMBL4657    | Protease                            | 0.110612204199 | 165 / 0               |
| Alpha-1a adrenergic receptor                       | ADRA1A       | P35348           | CHEMBL229     | Family A G protein-coupled receptor | 0.110612204199 | 633 / 73              |

| Target                                                                         | Common name | Uniprot ID | ChEMBL ID     | Target Class                        | Probability*   | Known actives (3D/2D) |
|--------------------------------------------------------------------------------|-------------|------------|---------------|-------------------------------------|----------------|-----------------------|
| Synaptic vesicular amine transporter (by homology)                             | SLC18A2     | Q05940     | CHEMBL1893    | Electrochemical transporter         | 0.110612204199 | 20 / 0                |
| Equilibrative nucleoside transporter 1                                         | SLC29A1     | Q99808     | CHEMBL1997    | Electrochemical transporter         | 0.110612204199 | 3 / 0                 |
| Alpha-2a adrenergic receptor                                                   | ADRA2A      | P08913     | CHEMBL1867    | Family A G protein-coupled receptor | 0.110612204199 | 81 / 0                |
| Adrenergic receptor alpha-2                                                    | ADRA2C      | P18825     | CHEMBL1916    | Family A G protein-coupled receptor | 0.110612204199 | 70 / 0                |
| Alpha-2b adrenergic receptor                                                   | ADRA2B      | P18089     | CHEMBL1942    | Family A G protein-coupled receptor | 0.110612204199 | 66 / 0                |
| Max-like protein X                                                             | MLX         | Q9UH92     | CHEMBL2062357 | Unclassified protein                | 0.110612204199 | 7 / 0                 |
| C-C chemokine receptor type 4                                                  | CCR4        | P51679     | CHEMBL2414    | Family A G protein-coupled receptor | 0.110612204199 | 31 / 0                |
| Arachidonate 5-lipoxygenase                                                    | ALOX5       | P09917     | CHEMBL215     | Oxidoreductase                      | 0.110612204199 | 6 / 0                 |
| Poly [ADP-ribose] polymerase-1                                                 | PARP1       | P09874     | CHEMBL3105    | Enzyme                              | 0.110612204199 | 431 / 0               |
| Serotonin 4 (5-HT4) receptor                                                   | HTR4        | Q13639     | CHEMBL1875    | Family A G protein-coupled receptor | 0.110612204199 | 53 / 0                |
| Voltage-gated N-type calcium channel alpha-1B subunit                          | CACNA1B     | Q00975     | CHEMBL4478    | Voltage-gated ion channel           | 0.110612204199 | 28 / 0                |
| Potassium/sodium hyperpolarization-activated cyclic nucleotide-gated channel 4 | HCN4        | Q9Y3Q4     | CHEMBL1250417 | Voltage-gated ion channel           | 0.110612204199 | 18 / 0                |
| Potassium/sodium hyperpolarization-activated cyclic nucleotide-gated channel 1 | HCN1        | O60741     | CHEMBL1795171 | Voltage-gated ion channel           | 0.110612204199 | 21 / 0                |
| Inhibitor of nuclear factor kappa B kinase beta subunit                        | IKBKB       | O14920     | CHEMBL1991    | Kinase                              | 0.110612204199 | 32 / 0                |
| Thrombin                                                                       | F2          | P00734     | CHEMBL204     | Protease                            | 0.110612204199 | 397 / 0               |
| Melanocortin receptor 5                                                        | MC5R        | P33032     | CHEMBL4608    | Family A G protein-coupled receptor | 0.110612204199 | 108 / 0               |
| Ghrelin receptor                                                               | GHSR        | Q92847     | CHEMBL4616    | Family A G protein-coupled receptor | 0.110612204199 | 185 / 0               |
| HERG                                                                           | KCNH2       | Q12809     | CHEMBL240     | Voltage-gated ion channel           | 0.110612204199 | 712 / 28              |
| C-C motif chemokine 5                                                          | CCL5        | P13501     | CHEMBL1275217 | Family A G protein-coupled receptor | 0.110612204199 | 22 / 0                |
| Serotonin 3a (5-HT3a) receptor                                                 | HTR3A       | P46098     | CHEMBL1899    | Ligand-gated ion channel            | 0.110612204199 | 70 / 0                |
| LDL-associated phospholipase A2                                                | PLA2G7      | Q13093     | CHEMBL3514    | Enzyme                              | 0.110612204199 | 12 / 0                |
| Butyrylcholinesterase                                                          | BCHE        | P06276     | CHEMBL1914    | Hydrolase                           | 0.110612204199 | 93 / 0                |
| Glucocorticoid receptor                                                        | NR3C1       | P04150     | CHEMBL2034    | Nuclear receptor                    | 0.110612204199 | 32 / 0                |
| Vasopressin V2 receptor                                                        | AVPR2       | P30518     | CHEMBL1790    | Family A G protein-                 | 0.110612204199 | 75 / 0                |

| Target                                                  | Common name    | Uniprot ID       | ChEMBL ID     | Target Class                        | Probability*   | Known actives (3D/2D) |
|---------------------------------------------------------|----------------|------------------|---------------|-------------------------------------|----------------|-----------------------|
|                                                         |                |                  |               | coupled receptor                    |                |                       |
| Oxytocin receptor                                       | OXTR           | P30559           | CHEMBL2049    | Family A G protein-coupled receptor | 0.110612204199 | 52 / 0                |
| Telomerase reverse transcriptase                        | TERT           | O14746           | CHEMBL2916    | Enzyme                              | 0.110612204199 | 25 / 0                |
| Arachidonate 15-lipoxygenase                            | ALOX15         | P16050           | CHEMBL2903    | Enzyme                              | 0.110612204199 | 4 / 0                 |
| Kir3.1/Kir3.4                                           | KCNJ5<br>KCNJ3 | P48544<br>P48549 | CHEMBL3038488 | Voltage-gated ion channel           | 0.110612204199 | 20 / 0                |
| C-X-C chemokine receptor type 3                         | CXCR3          | P49682           | CHEMBL4441    | Family A G protein-coupled receptor | 0.110612204199 | 73 / 0                |
| Neuropeptide Y receptor type 2                          | NPY2R          | P49146           | CHEMBL4018    | Family A G protein-coupled receptor | 0.110612204199 | 26 / 0                |
| Isocitrate dehydrogenase [NADP] cytoplasmic             | IDH1           | O75874           | CHEMBL2007625 | Enzyme                              | 0.110612204199 | 12 / 0                |
| Complement factor D                                     | CFD            | P00746           | CHEMBL2176771 | Protease                            | 0.110612204199 | 63 / 0                |
| Norepinephrine transporter                              | SLC6A2         | P23975           | CHEMBL222     | Electrochemical transporter         | 0.110612204199 | 145 / 0               |
| Lysosomal Pro-X carboxypeptidase                        | PRCP           | P42785           | CHEMBL2335    | Protease                            | 0.110612204199 | 147 / 0               |
| Geranylgeranyl transferase type I beta subunit          | PGGT1B         | P53609           | CHEMBL4135    | Enzyme                              | 0.110612204199 | 8 / 0                 |
| Tyrosine-protein kinase SYK                             | SYK            | P43405           | CHEMBL2599    | Kinase                              | 0.110612204199 | 137 / 0               |
| Adenosylhomocysteinase                                  | AHCY           | P23526           | CHEMBL2664    | Enzyme                              | 0.110612204199 | 31 / 0                |
| Hematopoietic cell protein-tyrosine phosphatase 70Z-PEP | PTPN22         | Q9Y2R2           | CHEMBL2889    | Phosphatase                         | 0.110612204199 | 4 / 0                 |
| Cyclin-dependent kinase 2                               | CDK2           | P24941           | CHEMBL301     | Kinase                              | 0.110612204199 | 33 / 0                |
| Serine/threonine-protein kinase PAK 4                   | PAK4           | O96013           | CHEMBL4482    | Kinase                              | 0.110612204199 | 37 / 0                |
| Sphingosine 1-phosphate receptor Edg-3                  | S1PR3          | Q99500           | CHEMBL3892    | Family A G protein-coupled receptor | 0.110612204199 | 7 / 0                 |
| Hepatocyte growth factor receptor                       | MET            | P08581           | CHEMBL3717    | Kinase                              | 0.110612204199 | 126 / 0               |
| c-Jun N-terminal kinase 1                               | MAPK8          | P45983           | CHEMBL2276    | Kinase                              | 0.110612204199 | 29 / 0                |
| 3-phosphoinositide dependent protein kinase-1           | PDPK1          | O15530           | CHEMBL2534    | Kinase                              | 0.110612204199 | 46 / 0                |
| Phospholipase D1                                        | PLD1           | Q13393           | CHEMBL2536    | Hydrolase                           | 0.110612204199 | 71 / 0                |
| c-Jun N-terminal kinase 3                               | MAPK10         | P53779           | CHEMBL2637    | Kinase                              | 0.110612204199 | 28 / 0                |
| Phospholipase D2                                        | PLD2           | O14939           | CHEMBL2734    | Hydrolase                           | 0.110612204199 | 60 / 0                |
| Bcl2-antagonist of cell death (BAD)                     | BAD            | Q92934           | CHEMBL3817    | Other cytosolic protein             | 0.110612204199 | 5 / 0                 |
| Apoptosis regulator Bcl-2                               | BCL2           | P10415           | CHEMBL4860    | Other ion channel                   | 0.110612204199 | 28 / 0                |
| Heat shock protein HSP 90-alpha                         | HSP90AA1       | P07900           | CHEMBL3880    | Other cytosolic protein             | 0.110612204199 | 56 / 0                |
| Voltage-gated T-type calcium channel                    | CACNA1H        | O95180           | CHEMBL1859    | Voltage-gated ion channel           | 0.110612204199 | 26 / 0                |

| Target                                                | Common name                                         | Uniprot ID                                               | ChEMBL ID     | Target Class                        | Probability*   | Known actives (3D/2D) |
|-------------------------------------------------------|-----------------------------------------------------|----------------------------------------------------------|---------------|-------------------------------------|----------------|-----------------------|
| alpha-1H subunit                                      |                                                     |                                                          |               |                                     |                |                       |
| Cannabinoid receptor 1                                | CNR1                                                | P21554                                                   | CHEMBL218     | Family A G protein-coupled receptor | 0.110612204199 | 95 / 0                |
| Adenosine A3 receptor                                 | ADORA3                                              | P0DMS8                                                   | CHEMBL256     | Family A G protein-coupled receptor | 0.110612204199 | 13 / 0                |
| Poly [ADP-ribose] polymerase 2                        | PARP2                                               | Q9UGN5                                                   | CHEMBL5366    | Enzyme                              | 0.110612204199 | 32 / 0                |
| Voltage-gated T-type calcium channel alpha-11 subunit | CACNA11                                             | Q9P0X4                                                   | CHEMBL5558    | Voltage-gated ion channel           | 0.110612204199 | 17 / 0                |
| Histamine H2 receptor                                 | HRH2                                                | P25021                                                   | CHEMBL1941    | Family A G protein-coupled receptor | 0.110612204199 | 22 / 0                |
| Epidermal growth factor receptor erbB1                | EGFR                                                | P00533                                                   | CHEMBL203     | Kinase                              | 0.110612204199 | 298 / 0               |
| Adrenergic receptor beta                              | ADRB2                                               | P07550                                                   | CHEMBL210     | Family A G protein-coupled receptor | 0.110612204199 | 12 / 0                |
| Beta-1 adrenergic receptor                            | ADRB1                                               | P08588                                                   | CHEMBL213     | Family A G protein-coupled receptor | 0.110612204199 | 21 / 0                |
| Glycogen synthase kinase-3 beta                       | GSK3B                                               | P49841                                                   | CHEMBL262     | Kinase                              | 0.110612204199 | 44 / 0                |
| Thymidine kinase, cytosolic                           | TK1                                                 | P04183                                                   | CHEMBL2883    | Transferase                         | 0.110612204199 | 2 / 0                 |
| Sphingosine-1-phosphate lyase 1                       | SGPL1                                               | O95470                                                   | CHEMBL3286061 | Enzyme                              | 0.110612204199 | 13 / 0                |
| MAP kinase ERK2                                       | MAPK1                                               | P28482                                                   | CHEMBL4040    | Kinase                              | 0.110612204199 | 131 / 0               |
| ATP-binding cassette sub-family G member 2            | ABCG2                                               | Q9UNQ0                                                   | CHEMBL5393    | Primary active transporter          | 0.110612204199 | 22 / 0                |
| Serine/threonine-protein kinase MARK1                 | MARK1                                               | Q9P0L2                                                   | CHEMBL5940    | Kinase                              | 0.110612204199 | 4 / 0                 |
| Tissue-type plasminogen activator                     | PLAT                                                | P00750                                                   | CHEMBL1873    | Protease                            | 0.110612204199 | 20 / 0                |
| C-X-C chemokine receptor type 7                       | ACKR3                                               | P25106                                                   | CHEMBL2010631 | Family A G protein-coupled receptor | 0.110612204199 | 25 / 0                |
| Trypsin I                                             | PRSS1                                               | P07477                                                   | CHEMBL209     | Protease                            | 0.110612204199 | 76 / 0                |
| Gamma-secretase                                       | PSEN2<br>PSENEN<br>NCSTN<br>APH1A<br>PSEN1<br>APH1B | P49810<br>Q9NZ42<br>Q92542<br>Q96BI3<br>P49768<br>Q8WW43 | CHEMBL2094135 | Protease                            | 0.110612204199 | 96 / 0                |
| Vascular endothelial growth factor receptor 2         | KDR                                                 | P35968                                                   | CHEMBL279     | Kinase                              | 0.110612204199 | 196 / 0               |
| Protein kinase C beta                                 | PRKCB                                               | P05771                                                   | CHEMBL3045    | Kinase                              | 0.110612204199 | 150 / 0               |
| Neuropeptide Y receptor type 5                        | NPY5R                                               | Q15761                                                   | CHEMBL4561    | Family A G protein-coupled receptor | 0.110612204199 | 21 / 0                |

**Table S2.** SwissTargetPrediction report obtained using Lurasidone\_Exo as the query molecule

| Target                                            | Common name | Uniprot ID | ChEMBL ID     | Target Class                        | Probability*   | Known actives (3D/2D) |
|---------------------------------------------------|-------------|------------|---------------|-------------------------------------|----------------|-----------------------|
| Dopamine D2 receptor (by homology)                | DRD2        | P14416     | CHEMBL217     | Family A G protein-coupled receptor | 0.693886270949 | 677 / 291             |
| Serotonin 2a (5-HT2a) receptor                    | HTR2A       | P28223     | CHEMBL224     | Family A G protein-coupled receptor | 0.449078210826 | 440 / 145             |
| Sigma opioid receptor                             | SIGMAR1     | Q99720     | CHEMBL287     | Membrane receptor                   | 0.103186936728 | 296 / 1               |
| Serotonin 1b (5-HT1b) receptor                    | HTR1B       | P28222     | CHEMBL1898    | Family A G protein-coupled receptor | 0.103186936728 | 83 / 1                |
| Scavenger receptor class B member 1 (by homology) | SCARB1      | Q8WTV0     | CHEMBL1914272 | Unclassified protein                | 0.103186936728 | 13 / 0                |
| Serotonin 1a (5-HT1a) receptor                    | HTR1A       | P08908     | CHEMBL214     | Family A G protein-coupled receptor | 0.103186936728 | 256 / 102             |
| Neurokinin 3 receptor                             | TACR3       | P29371     | CHEMBL4429    | Family A G protein-coupled receptor | 0.103186936728 | 18 / 0                |
| Cyclin-dependent kinase 9                         | CDK9        | P50750     | CHEMBL3116    | Kinase                              | 0.103186936728 | 85 / 0                |
| Apoptosis regulator Bcl-2                         | BCL2        | P10415     | CHEMBL4860    | Other ion channel                   | 0.103186936728 | 225 / 0               |
| Neurokinin 2 receptor                             | TACR2       | P21452     | CHEMBL2327    | Family A G protein-coupled receptor | 0.103186936728 | 215 / 0               |
| Delta opioid receptor                             | OPRD1       | P41143     | CHEMBL236     | Family A G protein-coupled receptor | 0.103186936728 | 484 / 0               |
| C-C chemokine receptor type 3                     | CCR3        | P51677     | CHEMBL3473    | Family A G protein-coupled receptor | 0.103186936728 | 190 / 0               |
| HERG                                              | KCNH2       | Q12809     | CHEMBL240     | Voltage-gated ion channel           | 0.103186936728 | 475 / 30              |
| Dopamine transporter (by homology)                | SLC6A3      | Q01959     | CHEMBL238     | Electrochemical transporter         | 0.103186936728 | 319 / 0               |
| Orexin receptor 2                                 | HCRTR2      | O43614     | CHEMBL4792    | Family A G protein-coupled receptor | 0.103186936728 | 9 / 0                 |
| Orexin receptor 1                                 | HCRTR1      | O43613     | CHEMBL5113    | Family A G protein-coupled receptor | 0.103186936728 | 9 / 0                 |
| Beta-secretase 1                                  | BACE1       | P56817     | CHEMBL4822    | Protease                            | 0.103186936728 | 744 / 0               |
| Cathepsin D                                       | CTSD        | P07339     | CHEMBL2581    | Protease                            | 0.103186936728 | 266 / 0               |
| Adrenergic receptor beta                          | ADRB2       | P07550     | CHEMBL210     | Family A G protein-coupled receptor | 0.103186936728 | 302 / 0               |
| Histamine H2 receptor                             | HRH2        | P25021     | CHEMBL1941    | Family A G protein-coupled receptor | 0.103186936728 | 14 / 0                |
| 3-phosphoinositide dependent protein kinase-1     | PDPK1       | O15530     | CHEMBL2534    | Kinase                              | 0.103186936728 | 68 / 0                |
| Serine/ threonine-protein kinase AKT              | AKT1        | P31749     | CHEMBL4282    | Kinase                              | 0.103186936728 | 140 / 0               |
| Acetyl-CoA carboxylase 1                          | ACACA       | Q13085     | CHEMBL3351    | Enzyme                              | 0.103186936728 | 2 / 0                 |
| Acetyl-CoA carboxylase 2                          | ACACB       | O00763     | CHEMBL4829    | Ligase                              | 0.103186936728 | 65 / 0                |

| Target                                                 | Common name | Uniprot ID | ChEMBL ID     | Target Class                        | Probability*   | Known actives (3D/2D) |
|--------------------------------------------------------|-------------|------------|---------------|-------------------------------------|----------------|-----------------------|
| p53-binding protein Mdm-2                              | MDM2        | Q00987     | CHEMBL5023    | Other nuclear protein               | 0.103186936728 | 165 / 0               |
| Tyrosine-protein kinase FYN                            | FYN         | P06241     | CHEMBL1841    | Kinase                              | 0.103186936728 | 19 / 0                |
| Platelet-derived growth factor receptor beta           | PDGFRB      | P09619     | CHEMBL1913    | Kinase                              | 0.103186936728 | 25 / 0                |
| Tyrosine-protein kinase YES                            | YES1        | P07947     | CHEMBL2073    | Kinase                              | 0.103186936728 | 14 / 0                |
| Tyrosine-protein kinase LCK                            | LCK         | P06239     | CHEMBL258     | Kinase                              | 0.103186936728 | 75 / 0                |
| Tyrosine-protein kinase SRC                            | SRC         | P12931     | CHEMBL267     | Kinase                              | 0.103186936728 | 169 / 0               |
| Vascular endothelial growth factor receptor 2          | KDR         | P35968     | CHEMBL279     | Kinase                              | 0.103186936728 | 277 / 0               |
| Melanin-concentrating hormone receptor 1               | MCHR1       | Q99705     | CHEMBL344     | Family A G protein-coupled receptor | 0.103186936728 | 287 / 0               |
| Fibroblast growth factor receptor 1                    | FGFR1       | P11362     | CHEMBL3650    | Kinase                              | 0.103186936728 | 97 / 0                |
| Inhibitor of apoptosis protein 3                       | XIAP        | P98170     | CHEMBL4198    | Other cytosolic protein             | 0.103186936728 | 124 / 0               |
| HLA-DR antigens-associated invariant chain             | CD74        | P04233     | CHEMBL4692    | Surface antigen                     | 0.103186936728 | 5 / 0                 |
| Alpha-1a adrenergic receptor                           | ADRA1A      | P35348     | CHEMBL229     | Family A G protein-coupled receptor | 0.103186936728 | 193 / 58              |
| Norepinephrine transporter                             | SLC6A2      | P23975     | CHEMBL222     | Electrochemical transporter         | 0.103186936728 | 110 / 0               |
| Histamine H3 receptor                                  | HRH3        | Q9Y5N1     | CHEMBL264     | Family A G protein-coupled receptor | 0.103186936728 | 257 / 0               |
| 6-phosphofructo-2-kinase/fructose-2,6-bisphosphatase 3 | PFKFB3      | Q16875     | CHEMBL2331053 | Enzyme                              | 0.103186936728 | 84 / 0                |
| Neuropeptide Y receptor type 1                         | NPY1R       | P25929     | CHEMBL4777    | Family A G protein-coupled receptor | 0.103186936728 | 74 / 0                |
| Voltage-gated T-type calcium channel alpha-1H subunit  | CACNA1H     | O95180     | CHEMBL1859    | Voltage-gated ion channel           | 0.103186936728 | 8 / 0                 |
| Alpha-2a adrenergic receptor                           | ADRA2A      | P08913     | CHEMBL1867    | Family A G protein-coupled receptor | 0.103186936728 | 69 / 0                |
| Adrenergic receptor alpha-2                            | ADRA2C      | P18825     | CHEMBL1916    | Family A G protein-coupled receptor | 0.103186936728 | 70 / 0                |
| Alpha-2b adrenergic receptor                           | ADRA2B      | P18089     | CHEMBL1942    | Family A G protein-coupled receptor | 0.103186936728 | 60 / 0                |
| Melanocortin receptor 4                                | MC4R        | P32245     | CHEMBL259     | Family A G protein-coupled receptor | 0.103186936728 | 128 / 0               |
| PI3-kinase p110-delta subunit                          | PIK3CD      | O00329     | CHEMBL3130    | Enzyme                              | 0.103186936728 | 126 / 0               |
| Glycine transporter 1                                  | SLC6A9      | P48067     | CHEMBL2337    | Electrochemical transporter         | 0.103186936728 | 65 / 0                |
| Methionine                                             | METAP1      | P53582     | CHEMBL2474    | Protease                            | 0.103186936728 | 11 / 0                |

| Target                                              | Common name | Uniprot ID | ChEMBL ID  | Target Class                        | Probability*   | Known actives (3D/2D) |
|-----------------------------------------------------|-------------|------------|------------|-------------------------------------|----------------|-----------------------|
| aminopeptidase 1                                    |             |            |            |                                     |                |                       |
| DNA-dependent protein kinase                        | PRKDC       | P78527     | CHEMBL3142 | Kinase                              | 0.103186936728 | 92 / 0                |
| Serine/threonine-protein kinase AKT2                | AKT2        | P31751     | CHEMBL2431 | Kinase                              | 0.103186936728 | 60 / 0                |
| Heat shock protein HSP 90-beta                      | HSP90AB1    | P08238     | CHEMBL4303 | Other cytosolic protein             | 0.103186936728 | 42 / 0                |
| Serine/threonine-protein kinase AKT                 | AKT3        | Q9Y243     | CHEMBL4816 | Kinase                              | 0.103186936728 | 39 / 0                |
| Insulin-like growth factor I receptor               | IGF1R       | P08069     | CHEMBL1957 | Kinase                              | 0.103186936728 | 214 / 0               |
| Phosphodiesterase 8B                                | PDE8B       | O95263     | CHEMBL4408 | Phosphodiesterase                   | 0.103186936728 | 23 / 0                |
| Vesicular acetylcholine transporter                 | SLC18A3     | Q16572     | CHEMBL4767 | Electrochemical transporter         | 0.103186936728 | 148 / 0               |
| Tyrosine-protein kinase JAK3                        | JAK3        | P52333     | CHEMBL2148 | Kinase                              | 0.103186936728 | 119 / 0               |
| Tyrosine-protein kinase JAK2                        | JAK2        | O60674     | CHEMBL2971 | Kinase                              | 0.103186936728 | 185 / 0               |
| Protein kinase C beta                               | PRKCB       | P05771     | CHEMBL3045 | Kinase                              | 0.103186936728 | 113 / 0               |
| P-glycoprotein 1                                    | ABCB1       | P08183     | CHEMBL4302 | Primary active transporter          | 0.103186936728 | 138 / 0               |
| Synaptic vesicular amine transporter (by homology)  | SLC18A2     | Q05940     | CHEMBL1893 | Electrochemical transporter         | 0.103186936728 | 61 / 0                |
| Phosphodiesterase 9A                                | PDE9A       | O76083     | CHEMBL3535 | Phosphodiesterase                   | 0.103186936728 | 17 / 0                |
| Phosphodiesterase 1C                                | PDE1C       | Q14123     | CHEMBL4619 | Phosphodiesterase                   | 0.103186936728 | 11 / 0                |
| Cannabinoid receptor 2 (by homology)                | CNR2        | P34972     | CHEMBL253  | Family A G protein-coupled receptor | 0.103186936728 | 205 / 0               |
| Cystic fibrosis transmembrane conductance regulator | CFTR        | P13569     | CHEMBL4051 | Other ion channel                   | 0.103186936728 | 4 / 0                 |
| Vasopressin V2 receptor                             | AVPR2       | P30518     | CHEMBL1790 | Family A G protein-coupled receptor | 0.103186936728 | 37 / 0                |
| Oxytocin receptor                                   | OXTR        | P30559     | CHEMBL2049 | Family A G protein-coupled receptor | 0.103186936728 | 37 / 0                |
| Beta-1 adrenergic receptor                          | ADRB1       | P08588     | CHEMBL213  | Family A G protein-coupled receptor | 0.103186936728 | 268 / 0               |
| Serotonin 7 (5-HT7) receptor                        | HTR7        | P34969     | CHEMBL3155 | Family A G protein-coupled receptor | 0.103186936728 | 76 / 33               |
| Vasopressin V1a receptor (by homology)              | AVPR1A      | P37288     | CHEMBL1889 | Family A G protein-coupled receptor | 0.103186936728 | 37 / 0                |
| Glycine transporter 2                               | SLC6A5      | Q9Y345     | CHEMBL3060 | Electrochemical transporter         | 0.103186936728 | 6 / 0                 |
| Beta amyloid A4 protein                             | APP         | P05067     | CHEMBL2487 | Membrane receptor                   | 0.103186936728 | 27 / 0                |
| Sphingosine kinase 2                                | SPHK2       | Q9NRA0     | CHEMBL3023 | Enzyme                              | 0.103186936728 | 41 / 0                |



| Target                                                | Common name                                         | Uniprot ID                                               | ChEMBL ID     | Target Class                        | Probability*   | Known actives (3D/2D) |
|-------------------------------------------------------|-----------------------------------------------------|----------------------------------------------------------|---------------|-------------------------------------|----------------|-----------------------|
| Sphingosine kinase 1                                  | SPHK1                                               | Q9NYA1                                                   | CHEMBL4394    | Enzyme                              | 0.103186936728 | 77 / 0                |
| ATP-sensitive inward rectifier potassium channel 1    | KCNJ1                                               | P48048                                                   | CHEMBL1293292 | Voltage-gated ion channel           | 0.103186936728 | 50 / 0                |
| Epidermal growth factor receptor erbB1                | EGFR                                                | P00533                                                   | CHEMBL203     | Kinase                              | 0.103186936728 | 279 / 0               |
| Gamma-secretase                                       | PSEN2<br>PSENEN<br>NCSTN<br>APH1A<br>PSEN1<br>APH1B | P49810<br>Q9NZ42<br>Q92542<br>Q96BI3<br>P49768<br>Q8WW43 | CHEMBL2094135 | Protease                            | 0.103186936728 | 72 / 0                |
| Neuropeptide Y receptor type 5                        | NPY5R                                               | Q15761                                                   | CHEMBL4561    | Family A G protein-coupled receptor | 0.103186936728 | 15 / 0                |
| Serotonin 1d (5-HT1d) receptor                        | HTR1D                                               | P28221                                                   | CHEMBL1983    | Family A G protein-coupled receptor | 0.103186936728 | 90 / 0                |
| Voltage-gated T-type calcium channel alpha-1I subunit | CACNA1I                                             | Q9P0X4                                                   | CHEMBL5558    | Voltage-gated ion channel           | 0.103186936728 | 4 / 0                 |
| Bromodomain-containing protein 4                      | BRD4                                                | O60885                                                   | CHEMBL1163125 | Reader                              | 0.103186936728 | 17 / 0                |
| Cyclin-dependent kinase 4/cyclin D1                   | CCND1<br>CDK4                                       | P24385<br>P11802                                         | CHEMBL1907601 | Kinase                              | 0.103186936728 | 59 / 0                |
| Thrombin                                              | F2                                                  | P00734                                                   | CHEMBL204     | Protease                            | 0.103186936728 | 148 / 0               |
| Cyclin-dependent kinase 2/cyclin E                    | CCNE2<br>CDK2<br>CCNE1                              | O96020<br>P24941<br>P24864                               | CHEMBL2094126 | Other cytosolic protein             | 0.103186936728 | 70 / 0                |
| ATPase family AAA domain-containing protein 2         | ATAD2                                               | Q6PL18                                                   | CHEMBL2150837 | Reader                              | 0.103186936728 | 6 / 0                 |
| Serine/threonine-protein kinase mTOR                  | MTOR                                                | P42345                                                   | CHEMBL2842    | Kinase                              | 0.103186936728 | 604 / 0               |
| Heat shock protein HSP 90-alpha                       | HSP90AA1                                            | P07900                                                   | CHEMBL3880    | Other cytosolic protein             | 0.103186936728 | 100 / 0               |
| PI3-kinase p110-alpha subunit                         | PIK3CA                                              | P42336                                                   | CHEMBL4005    | Enzyme                              | 0.103186936728 | 485 / 0               |
| Butyrylcholinesterase                                 | BCHE                                                | P06276                                                   | CHEMBL1914    | Hydrolase                           | 0.103186936728 | 20 / 0                |
| Protein farnesyltransferase                           | FNTA<br>FNTB                                        | P49354<br>P49356                                         | CHEMBL2094108 | Enzyme                              | 0.103186936728 | 49 / 0                |
| Tyrosine-protein kinase SYK                           | SYK                                                 | P43405                                                   | CHEMBL2599    | Kinase                              | 0.103186936728 | 417 / 0               |
| Poly [ADP-ribose] polymerase-1                        | PARP1                                               | P09874                                                   | CHEMBL3105    | Enzyme                              | 0.103186936728 | 58 / 0                |
| Tyrosine-protein kinase receptor FLT3                 | FLT3                                                | P36888                                                   | CHEMBL1974    | Kinase                              | 0.103186936728 | 98 / 0                |
| Cyclin-dependent kinase 2/cyclin A                    | CDK2<br>CCNA1<br>CCNA2                              | P24941<br>P78396<br>P20248                               | CHEMBL2094128 | Other cytosolic protein             | 0.103186936728 | 38 / 0                |
| Gonadotropin-releasing hormone receptor               | GNRHR                                               | P30968                                                   | CHEMBL1855    | Family A G protein-coupled receptor | 0.103186936728 | 79 / 0                |
| Vitamin D receptor                                    | VDR                                                 | P11473                                                   | CHEMBL1977    | Nuclear receptor                    | 0.103186936728 | 66 / 0                |
| Beta-3 adrenergic                                     | ADRB3                                               | P13945                                                   | CHEMBL246     | Family A G protein-                 | 0.103186936728 | 235 / 0               |

| Target                                 | Common name | Uniprot ID | ChEMBL ID     | Target Class                        | Probability*   | Known actives (3D/2D) |
|----------------------------------------|-------------|------------|---------------|-------------------------------------|----------------|-----------------------|
| receptor                               |             |            |               | coupled receptor                    |                |                       |
| Programmed cell death 1 ligand 1       | CD274       | Q9NZQ7     | CHEMBL3580522 | Unclassified protein                | 0.103186936728 | 3 / 0                 |
| Urotensin II receptor                  | UTS2R       | Q9UKP6     | CHEMBL3764    | Family A G protein-coupled receptor | 0.103186936728 | 35 / 0                |
| Dual specificity protein kinase TTK    | TTK         | P33981     | CHEMBL3983    | Kinase                              | 0.103186936728 | 26 / 0                |
| Potassium channel subfamily K member 3 | KCNK3       | O14649     | CHEMBL2321613 | Voltage-gated ion channel           | 0.103186936728 | 2 / 0                 |
